# Supplementary material
Source: ML conference proceedings conference paper supplement (https://aclanthology.org/2023.trustnlp-1.2)

- bank (finance)
- bank (nature)

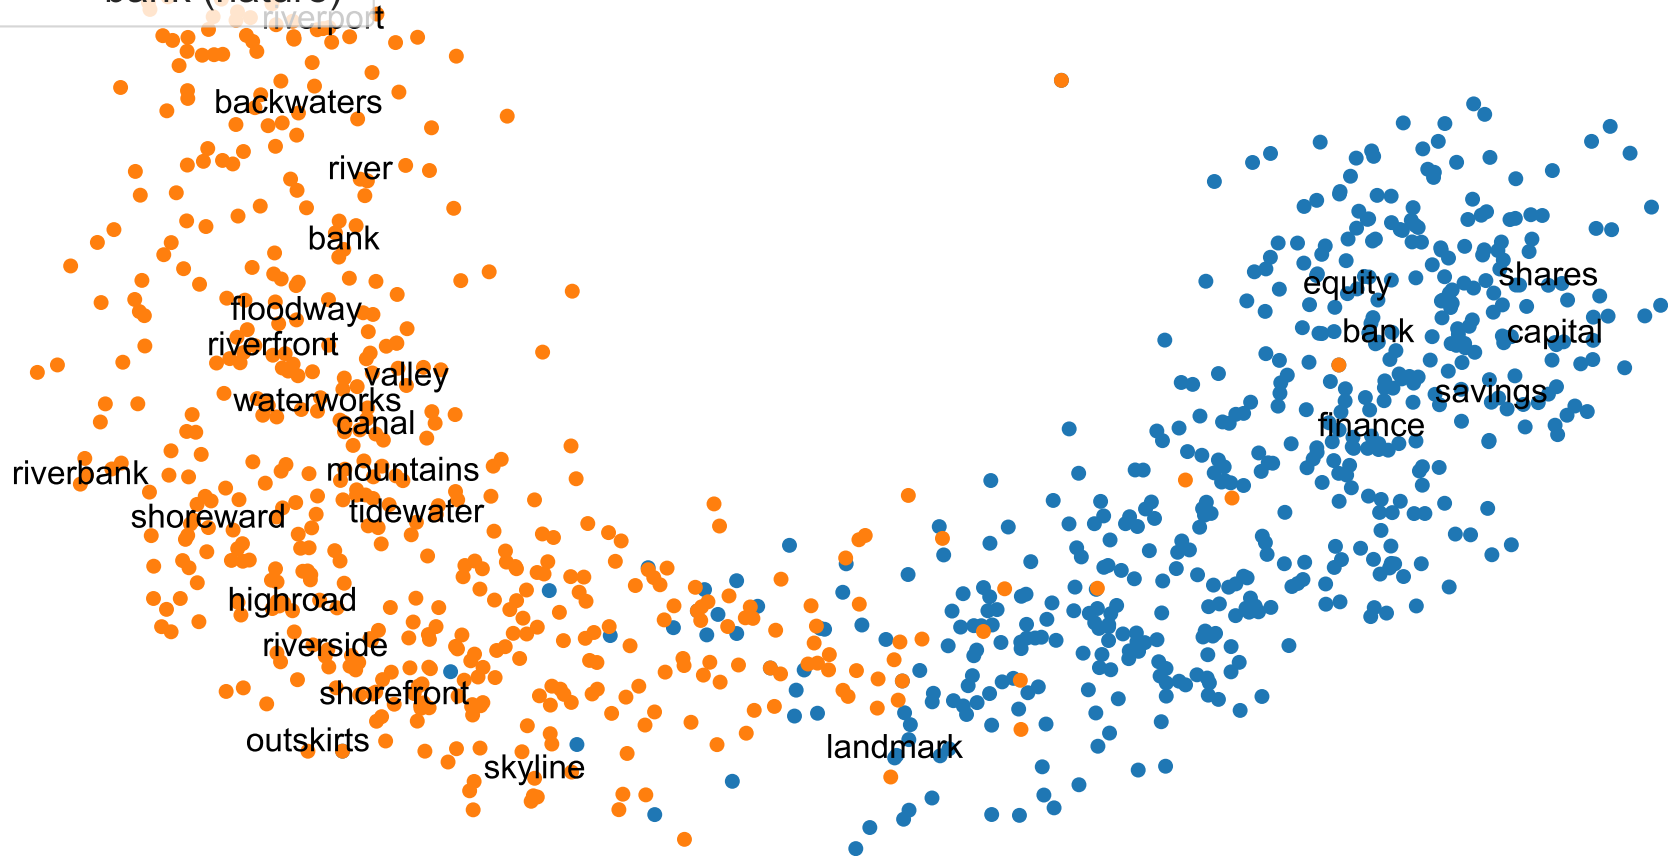

Supplement: SupplementaryMaterial [file ctx_example.pdf › resources/ctx_example.pdf]

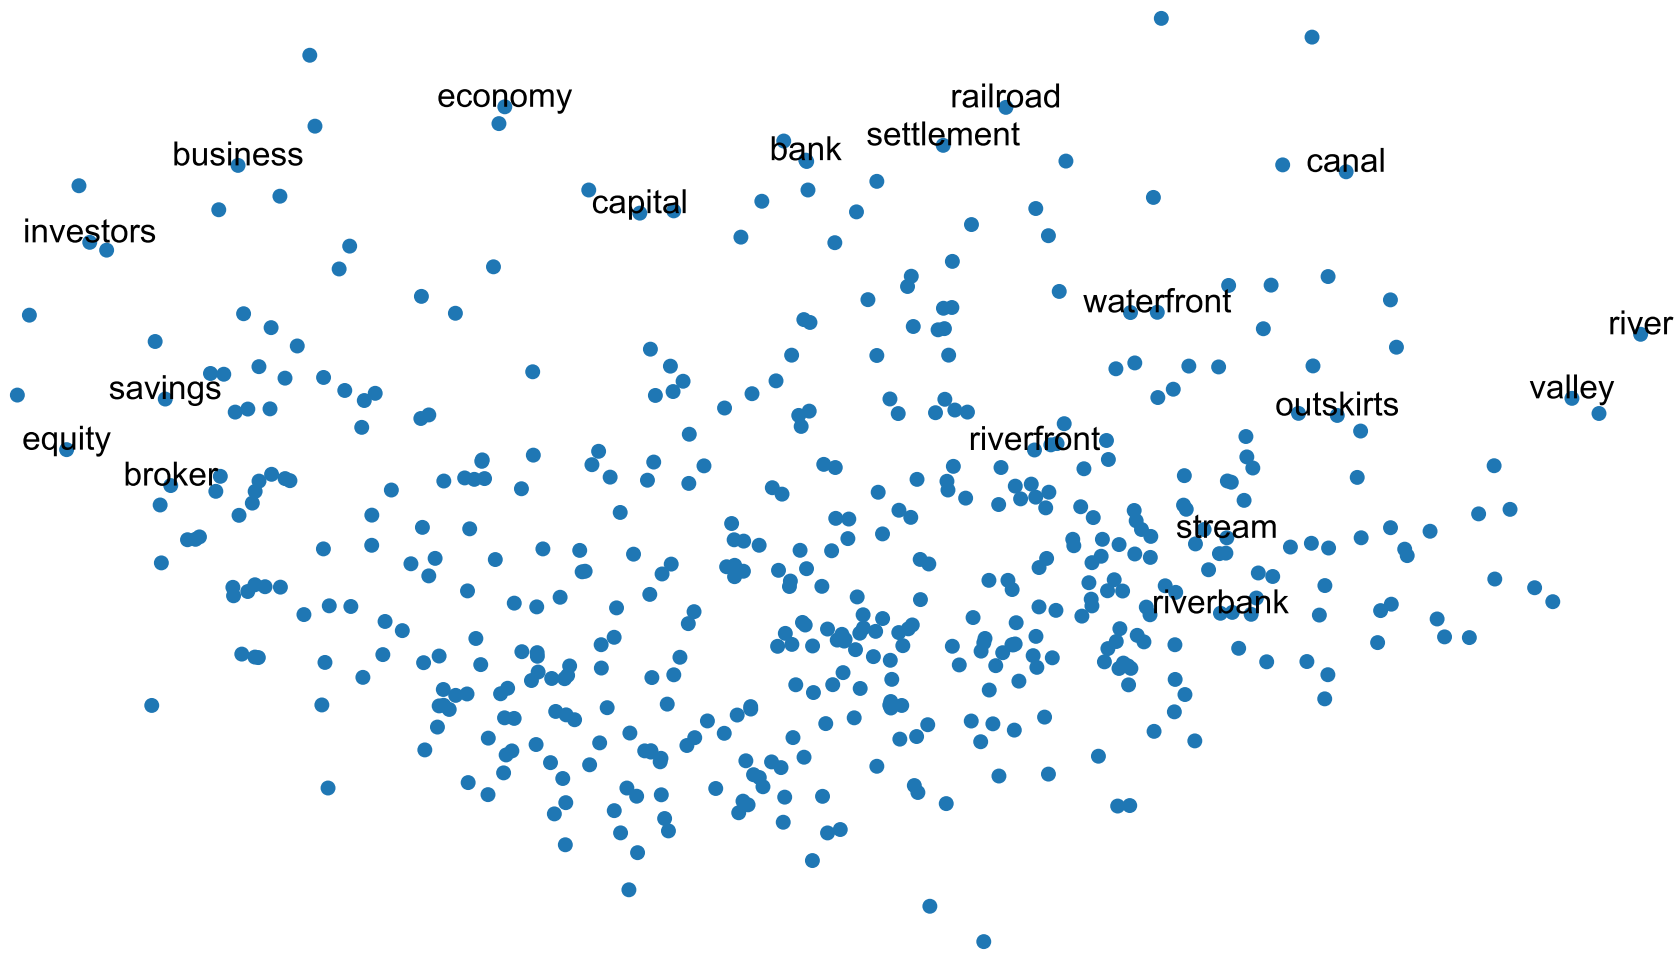

Supplement: SupplementaryMaterial [file lex_example.pdf › resources/lex_example.pdf]

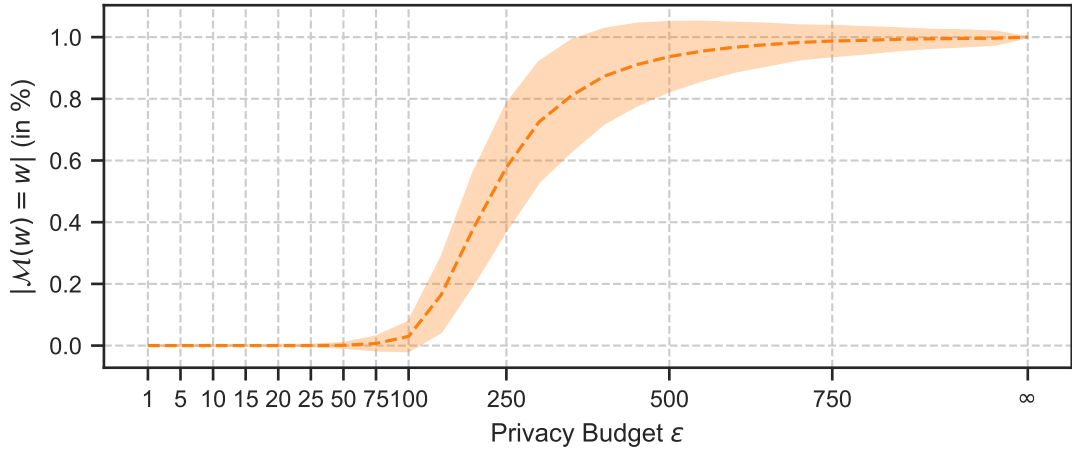

Supplement: SupplementaryMaterial [file nw_ctx.pdf › resources/nw_ctx.pdf]

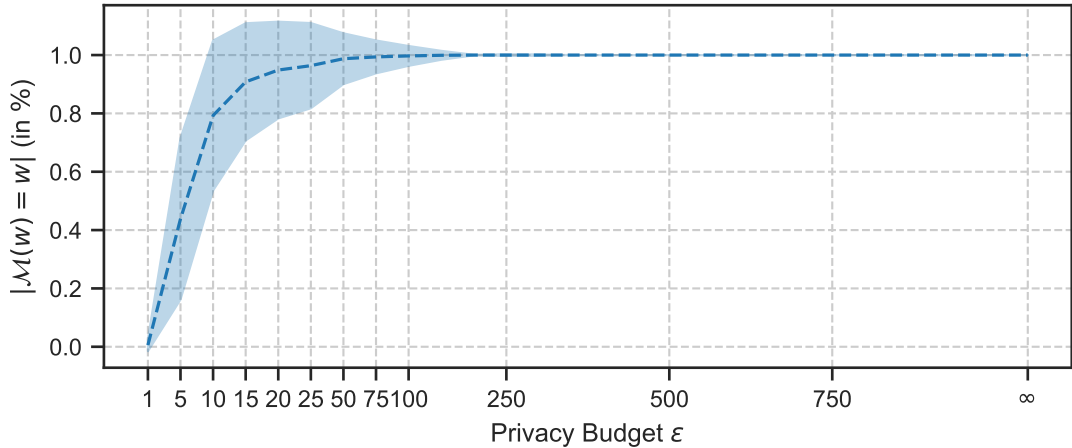

Supplement: SupplementaryMaterial [file nw_lex.pdf › resources/nw_lex.pdf]

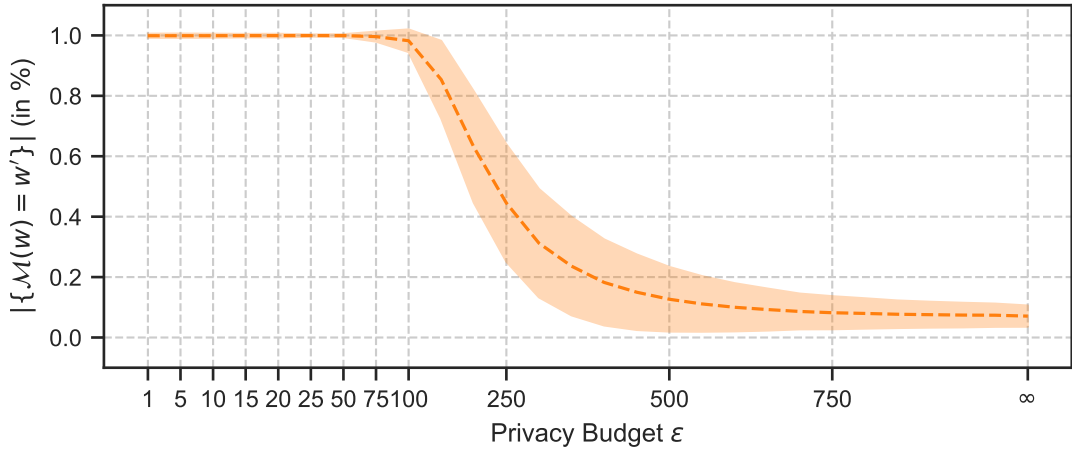

Supplement: SupplementaryMaterial [file sw_ctx.pdf › resources/sw_ctx.pdf]

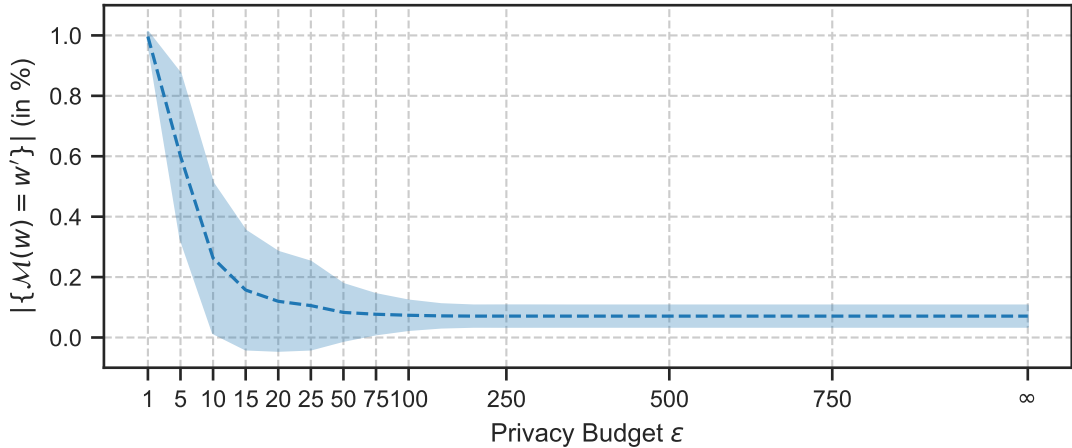

Supplement: SupplementaryMaterial [file sw_lex.pdf › resources/sw_lex.pdf]

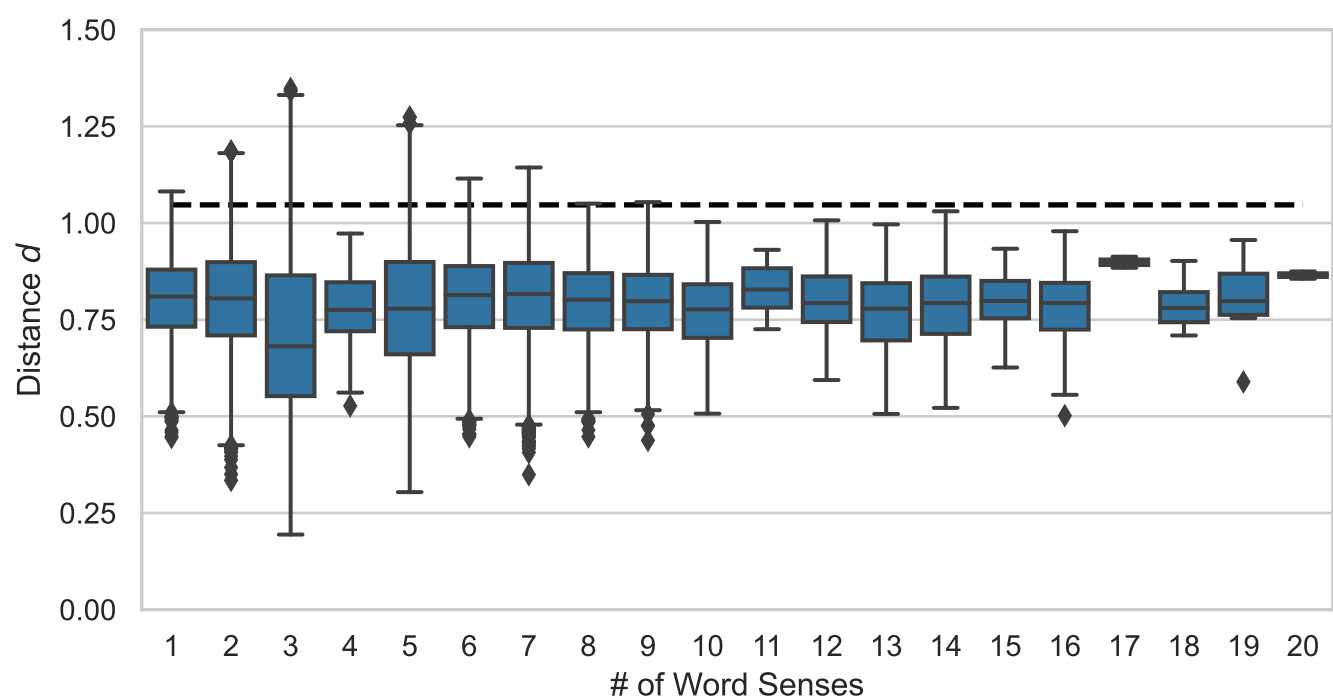

Supplement: SupplementaryMaterial [file utility_distances.pdf › resources/utility_distances.pdf]

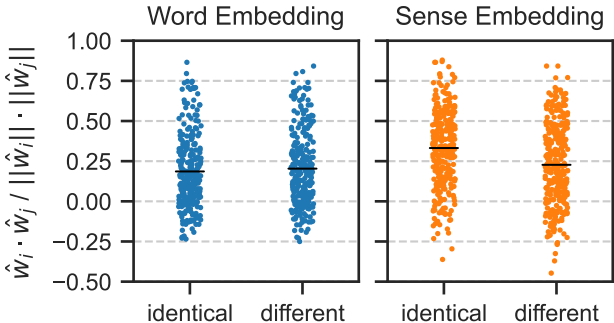

Supplement: SupplementaryMaterial [file utility_similarities.pdf › resources/utility_similarities.pdf]
